# Supplementary material
Source: publisher figshare collection journal article supplement (https://karger.figshare.com/ndownloader/files/27922188)
Supplement: Supplementary file 1 [file 27922188]

**Appendix 1**

Embase search strategy:

'myotonic dystrophy'/exp OR 'myoton* dystroph*':ab,ti,kw OR 'myoton* atrophica':ab,ti,kw OR 'steinert* disease':ab,ti,kw

AND

'sleep disordered breathing'/exp OR 'sleep disordered breathing':ti,ab,kw OR 'respiratory failure'/exp OR 'apn* sleep':ti,ab,kw OR 'nocturnal apn*':ti,ab,kw OR 'obstructive apn*':ti,ab,kw OR 'respiratory insufficiency':ti,ab,kw OR 'sleep apn*':ti,ab,kw OR 'sleep hypopn*':ti,ab,kw OR 'central apn*':ti,ab,kw OR osa*:ti,ab,kw OR hypercapn*:ti,ab,kw OR hypoventilation:ti,ab,kw

AND

'artificial ventilation'/exp OR niv:ti,ab,kw OR hmv:ti,ab,kw OR 'bilevel positive airway pressure':ti,ab,kw OR 'ventilator* support':ti,ab,kw OR 'positive pressure respiration':ti,ab,kw OR 'ventilator requirement':ti,ab,kw OR ventilation:ti,ab,kw OR bpap:ti,ab,kw

Pubmed search strategy:

("Myotonic Dystrophy"[Mesh] OR myotonic dystroph*[tiab] OR myotonia atrophica[tiab] OR steinerts disease[tiab] OR steinert’s disease[tiab] OR steinert disease[tiab])

AND

("Respiratory Insufficiency"[Mesh] OR respiratory failure*[tiab] OR respiratory insufficienc*[tiab] OR "sleep apnea syndromes"[Mesh] OR sleep apn*[tiab] OR sleep hypopn*[tiab] OR sleep-disordered breathing[tiab] OR central apn*[tiab] OR alveolar hypoventilation*[tiab] OR obstructive apn*[tiab] OR OSA*[tiab] OR hypercapn*[tiab] OR apn*[tiab] OR hypoventilation[tiab])

AND

("Respiration, Artificial"[Mesh] OR artificial respiration*[tiab] OR noninvasive ventilation[tiab] OR non-invasive ventilation[tiab] OR NIV[tiab] OR HMV[tiab] OR bilevel positive airway pressure[tiab] OR ventilator* support[tiab] OR positive pressure respiration[tiab] OR ventilator requirement[tiab] OR ventilation[tiab])
